# Supplementary material for: Analysis of the Holarctic Dictyoptera aurora Complex (Coleoptera, Lycidae) Reveals Hidden Diversity and Geographic Structure in Müllerian Mimicry Ring
Source: MDPI journal article supplement (doi:10.3390/insects13090817), 2022-09-07
Supplement: s1 [file s1]

Table S1. Genetic distances among *D. aurora* barcodes

[illegible]
